# Supplementary material
Source: Springer Nature journal article supplement (https://www.springermedizin.de/resource/supplementary/12885_2011_3042_MOESM3_ESM.pdf/9462732)

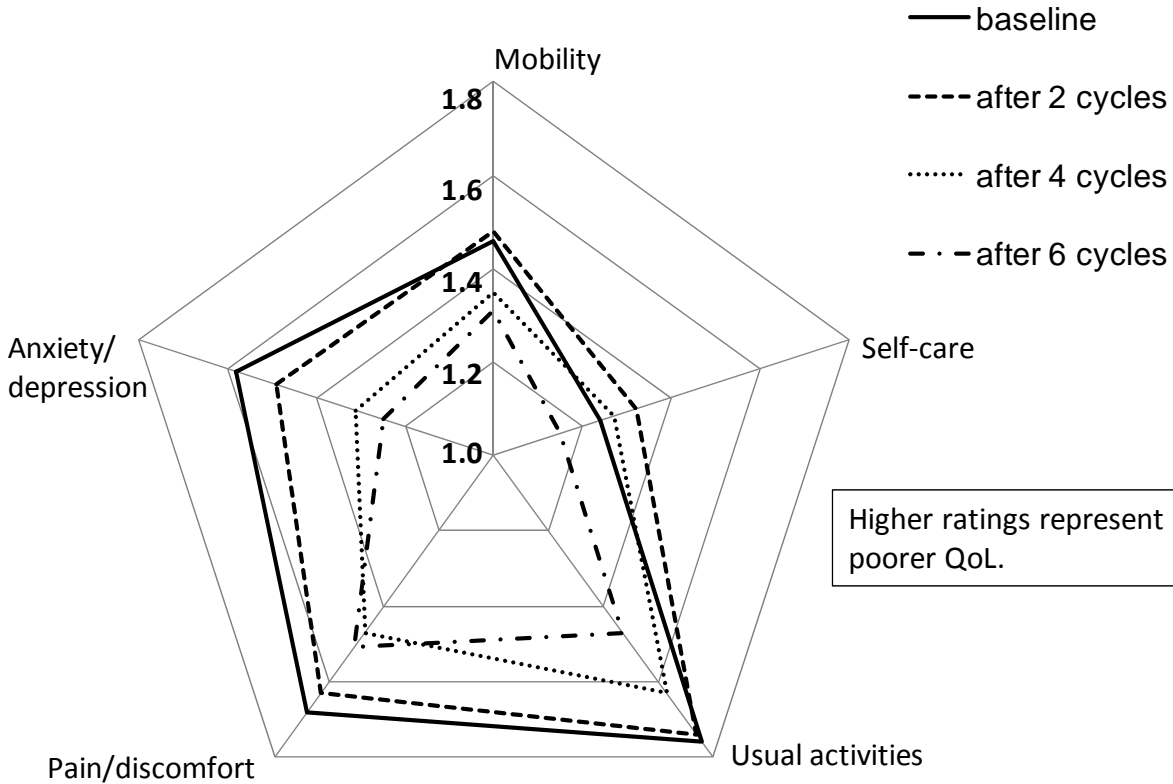

- baseline
- - - after 2 cycles
- ..... after 4 cycles
- · - after 6 cycles

Higher ratings represent poorer QoL.

Supplement: MOESM3 [file 9462732]
